# Supplementary material for: Differential Effects of Speech and Language Therapy and rTMS in Chronic Versus Subacute Post-stroke Aphasia: Results of the NORTHSTAR-CA Trial
Source: PubMed Central journal article supplement — Neurorehabil Neural Repair. 2022 Mar 25;36(4-5):306–16. doi: 10.1177/15459683211065448 (PMC9003806; doi:10.1177/15459683211065448), 2022-03-25
Supplement: sj-pdf-1-nnr-10.1177_15459683211065448.pdf [file sj-pdf-1-nnr-10.1177_15459683211065448.pdf]

**Supplemental Table 1** – Individual baseline data of NORTHSTA-CA patients (chronic aphasia).

NIHSS, National Institutes of Health Stroke Scale; F, Frontal lobe; P, Parietal lobe; T, Temporal lobe; I, Insula; BG, Basal ganglia; BNT, Boston Naming Test; SF1min, Semantic Fluency test (animals in 1 minute); TT, 36-item Token Test; UnAS, Unified Aphasia Score.

| Randomization group | Chronic patient ID | Months post-stroke | NIHSS | Lesion location (middle cerebral artery territories, y/n) |   |   |   |    |         | Language scores at baseline        |                                 |                            |                |
|---------------------|--------------------|--------------------|-------|-----------------------------------------------------------|---|---|---|----|---------|------------------------------------|---------------------------------|----------------------------|----------------|
|                     |                    |                    |       | F                                                         | P | T | I | BG | Broca's | Naming (BNT total correct Z-score) | Verbal fluency (SF1min Z-score) | Comprehension (TT Z-score) | UnAS (T-score) |
| rTMS                |                    |                    |       |                                                           |   |   |   |    |         |                                    |                                 |                            |                |
|                     | 819                | 95                 | 3     | y                                                         | n | y | y | n  | y       | -6.0                               | -0.5                            | -9.9                       | 73.9           |
|                     | 812                | 16                 | 8     | y                                                         | y | y | n | n  | y       | -10.8                              | -3.1                            | -10.2                      | 5.4            |
|                     | 808                | 151                | 10    | n                                                         | y | y | y | n  | y       | -12.6                              | -2.7                            | -11.6                      | 12.5           |
|                     | 813                | 17                 | 6     | y                                                         | n | n | y | y  | y       | -0.5                               | -1.6                            | -0.9                       | 41.4           |
|                     | 805                | 108                | 14    | y                                                         | y | y | y | y  | y       | -7.4                               | -3.2                            | -13.8                      | 24.8           |
|                     | 806                | 8                  | 10    | y                                                         | n | n | y | y  | y       | -7.9                               | -3.4                            | -10.1                      | 47.6           |
|                     | 823                | 17                 | 1     | y                                                         | n | n | y | y  | y       | -2.7                               | -0.7                            | -1.1                       | 47.3           |
|                     | 824                | 23                 | 4     | y                                                         | y | n | y | y  | y       | -5.3                               | -2.4                            | -7.8                       | 24.2           |
|                     | 821                | 174                | 5     | y                                                         | y | y | y | n  | y       | -4.6                               | -0.9                            | -8.1                       | 25.8           |
|                     | 817                | 42                 | 6     | y                                                         | y | n | n | n  | y       | -3.7                               | -2.4                            | -6.9                       | 84.7           |
|                     | 807                | 76                 | 2     | n                                                         | y | n | n | n  | n       | -6.4                               | -0.9                            | -9.1                       | 71.9           |
|                     | 802                | 51                 | 8     | y                                                         | y | n | y | y  | y       | -5.4                               | 0.0                             | -7.4                       | 18.8           |
|                     | 818                | 8                  | 6     | y                                                         | y | n | y | n  | y       | -8.8                               | -3.1                            | -12.7                      | 1.5            |
|                     | 814                | 16                 | 5     | y                                                         | n | n | n | y  | y       | -6.6                               | -3.1                            | -4.3                       | 8.8            |
| sham                |                    |                    |       |                                                           |   |   |   |    |         |                                    |                                 |                            |                |
|                     | 831                | 16                 | 4     | n                                                         | y | y | y | n  | y       | -6.8                               | -2.1                            | -10.4                      | 5.4            |
|                     | 828                | 129                | 7     | y                                                         | n | n | y | y  | y       | -7.4                               | -3.0                            | -9.9                       | 56.7           |
|                     | 803                | 284                | 10    | y                                                         | y | n | y | y  | y       | -0.5                               | -0.7                            | -2.0                       | 50.8           |
|                     | 815                | 8                  | 5     | n                                                         | n | y | y | y  | y       | -11.3                              | -3.6                            | -9.7                       | 25.4           |
|                     | 820                | 13                 | 17    | y                                                         | y | n | y | y  | y       | -8.8                               | -3.4                            | -16.2                      | 7.5            |
|                     | 809                | 71                 | 10    | y                                                         | n | n | y | y  | y       | -5.8                               | -1.9                            | -6.9                       | 24.8           |
|                     | 825                | 19                 | 1     | y                                                         | n | n | y | n  | y       | -2.2                               | -0.5                            | -2.1                       | 27.9           |
|                     | 829                | 65                 | 1     | y                                                         | n | n | n | n  | y       | -8.7                               | -1.7                            | -6.1                       | 33.9           |
|                     | 826                | 48                 | 7     | y                                                         | n | n | n | y  | y       | -8.0                               | -3.3                            | -12.3                      | 1.0            |
|                     | 816                | 13                 | 11    | y                                                         | y | n | n | y  | y       | -8.3                               | -3.4                            | -16.5                      | 3.0            |
|                     | 822                | 87                 | 3     | y                                                         | y | n | n | n  | n       | -1.2                               | -0.8                            | -1.3                       | 41.7           |
|                     | 810                | 6                  | 13    | y                                                         | y | y | y | n  | y       | -12.3                              | -3.4                            | -15.7                      | 0.6            |
|                     | 801                | 16                 | 17    | y                                                         | y | n | y | y  | y       | -9.6                               | -3.4                            | -15.5                      | 7.8            |
|                     | 827                | 310                | 3     | y                                                         | y | y | y | y  | y       | -11.8                              | -0.9                            | -10.7                      | 17.4           |

**Supplemental Table 2** – Correlations of outcome variables with baseline scores, months post-stroke at recruitment and baseline Resting Motor Threshold (RMT) in the whole chronic patient sample (N=28).

BNT, Boston Naming Test; SF1min, Semantic Fluency test (animals in 1 minute); TT, 36-item Token Test. \* identifies *p*-values <0.05.

| Change relative to baseline                        |        | Correlation with baseline score<br>(Spearman's coefficient and <i>p</i> -value) | Correlation with post-stroke months at recruitment (Spearman's coefficient and <i>p</i> -value) | Correlation with baseline RMT<br>(Spearman's coefficient and <i>p</i> -value) |
|----------------------------------------------------|--------|---------------------------------------------------------------------------------|-------------------------------------------------------------------------------------------------|-------------------------------------------------------------------------------|
| <b>Naming (BNT)</b>                                | Day 1  | 0.067<br>.736                                                                   | .447*<br>.017                                                                                   | 0.011<br>.954                                                                 |
|                                                    | Day 30 | -0.011<br>.956                                                                  | .400*<br>.035                                                                                   | 0.099<br>.616                                                                 |
| <b>Verbal fluency (SF1min)</b>                     | Day 1  | 0.313<br>.105                                                                   | 0.214<br>.275                                                                                   | -0.037<br>.853                                                                |
|                                                    | Day 30 | .462*<br>.013                                                                   | 0.352<br>.067                                                                                   | 0.318<br>.099                                                                 |
| <b>Comprehension (TT)</b>                          | Day 1  | 0.169<br>.391                                                                   | 0.066<br>.738                                                                                   | -0.357<br>.062                                                                |
|                                                    | Day 30 | 0.143<br>.468                                                                   | .404*<br>.033                                                                                   | -0.007<br>.971                                                                |
| <b>Unified Aphasia Score (UnAS) percent change</b> | Day 1  | -.547*<br>.003                                                                  | -0.268<br>.169                                                                                  | -0.188<br>.338                                                                |
|                                                    | Day 30 | -.426*<br>.024                                                                  | -0.305<br>.115                                                                                  | -0.248<br>.203                                                                |

**Supplemental Table 3** – Correlations of outcome variables with baseline scores, months post-stroke at recruitment and baseline Resting Motor Threshold (RMT) in the rTMS chronic patient group (N=14). \*identifies p-values <0.05.

BNT, Boston Naming Test; SF1min, Semantic Fluency test (animals in 1 minute); TT, 36-item Token Test.

| Change relative to baseline                        |        | Correlation with baseline score (Spearman's coefficient and <i>p-value</i> ) | Correlation with post-stroke months at recruitment (Spearman's coefficient and <i>p-value</i> ) | Correlation with baseline RMT (Spearman's coefficient and <i>p-value</i> ) |
|----------------------------------------------------|--------|------------------------------------------------------------------------------|-------------------------------------------------------------------------------------------------|----------------------------------------------------------------------------|
| <b>Naming (BNT)</b>                                | Day 1  | -0.007<br>.982                                                               | 0.451<br>.106                                                                                   | -0.031<br>.917                                                             |
|                                                    | Day 30 | -0.007<br>.982                                                               | 0.439<br>.116                                                                                   | 0.080<br>.787                                                              |
| <b>Verbal fluency (SF1min)</b>                     | Day 1  | 0.398<br>.159                                                                | -0.080<br>.787                                                                                  | 0.138<br>.637                                                              |
|                                                    | Day 30 | .700*<br>.005                                                                | 0.282<br>.328                                                                                   | 0.508<br>.063                                                              |
| <b>Comprehension (TT)</b>                          | Day 1  | -0.029<br>.922                                                               | -0.082<br>.781                                                                                  | -0.506<br>.065                                                             |
|                                                    | Day 30 | -0.117<br>.690                                                               | 0.164<br>.576                                                                                   | -0.023<br>.937                                                             |
| <b>Unified Aphasia Score (UnAS) percent change</b> | Day 1  | -0.530<br>.051                                                               | -0.398<br>.159                                                                                  | -0.264<br>.362                                                             |
|                                                    | Day 30 | -0.503<br>.067                                                               | -.538*<br>.047                                                                                  | -0.477<br>.084                                                             |
